# Supplementary material for: Assessing and managing environmental hazards of polymers: historical development, science advances and policy options
Source: Royal Society of Chemistry journal article supplement (doi:10.1039/d2em00386d), 2022-12-13
Supplement: d2em00386d1.xlsx [file d2em00386d1.xlsx]

## Sheet: Summary
Supplementary information Assessing and managing environmental hazards of polymers: Historical development, science advances and policy options Ksenia J. Groh1*, Hans Peter H. Arp2,3, Matthew MacLeod4, Zhanyun Wang5* 1Eawag, Swiss Federal Institute of Aquatic Science and Technology, 8600 Dübendorf, Switzerland 2Department of Environmental Engineering, Norwegian Geotechnical Institute, NO-0806 Osl…
Table S1	provides an overview of the polymer definitions being used in different jurisdictions
Table S2	provides an overview of the definitions of polymers of low concern (PLC) being used in different jurisdictions
Table S3	provides an overview of regulatory approaches to polymer assessment and management in different jurisdictions

## Sheet: Table S1. Definition_Polymers
	Polymer	Notes
OECD Definitions	a substance consisting of molecules - characterised by the sequence of one or more types of monomer units and - comprising a simple weight majority of molecules containing at least 3 monomer units - which are covalently bound to at least one other monomer unit or other reactant and - which consists of less than a simple weight majority of molecules of the same weight. Such molecules must be distr…	Impurities 1. The presence of impurities, which includes unreacted (residual) monomer in the polymer, was also discussed. While important in the hazard or risk assessment of a polymer, it was not considered to be a criterion for determining the data set needed.
Australia	Same as the OECD definition, but changing "a simple weight majority" to "greater than 50% by weight"
Canada	Same as the OECD definition, but changing "a simple weight majority" to "greater than 50% by weight"
China	Same as the OECD definition, but changing "a simple weight majority" to "greater than 50% by weight"
Taiwan, China
Japan	Same as the OECD definition, but changing "a simple weight majority" to "greater than 50% by weight" and adding "the number average molecular weight is 1000 or more".	Polymers are not distinguished by manner of polymerization, degree of crystallinity, tacticity or degree of polymerization (incl. degree of condensation) when the polymers do not have differences from the repeating unites (monomers and other reactants for polycondensation) and manner of polymerization. With regard to a compound that is an organic polymer which includes an initiator or chain trans…
Republic of Korea	Same as the OECD definition, but changing "a simple weight majority" to "greater than 50% by weight"
Philippines	Same as the OECD definition, but changing "a simple weight majority" to "greater than 50% by weight"
Switzerland	Same as the OECD definition
US	Same as the OECD definition

## Sheet: Table S2. Definition_PLC
Criterion	OECD definition of PLC [A]	Considerations behind the OECD definition	Australia	Canada	China	Taiwan, China	Japan	Republic of Korea	Philippines	US
Notes		These are direct quotes from the original documents. [Text in brackets] indicates the change of wording in the quotes to ease the read.	https://www.legislation.gov.au/Details/F2022C00255	https://laws-lois.justice.gc.ca/eng/regulations/SOR-2005-247/page-2.html#h-717907	https://www.mee.gov.cn/xxgk2018/xxgk/xxgk01/202011/t20201119_808843.html	https://law.moj.gov.tw/ENG/LawClass/LawAll.aspx?pcode=O0060043	https://www.japaneselawtranslation.go.jp/en/laws/view/3350	https://elaw.klri.re.kr/eng_service/lawView.do?hseq=49167&lang=ENG	https://chemical.emb.gov.ph/wp-content/uploads/2019/11/DAO201918Polymer.pdf	https://www.epa.gov/reviewing-new-chemicals-under-toxic-substances-control-act-tsca/polymer-exemption-new-chemicals https://www.ecfr.gov/current/title-40/chapter-I/subchapter-R/part-723#sp40.34.723.b
Individual criterion			ALL of the following criteria apply:	ONE of the following applies:	ONE of the following applies + "others" applies at all times	ONE of the following applies:	ALL of the following criteria applies:	ONE of the following applies:	ALL of the following criteria applies:	ONE of the following criteria applies + "others" always applies
Molecular weight (MW)	the range of 1,000–10,000 Mn was agreed as a range within which the concern value was likely to lie	✦ The scientific basis for this criterion is that number average molecular weight (MWn [or Mn]) is related to the ability of the molecule to pass membranes and therefore be absorbed by organisms. ... MWn determination is usually the first step in identifying potential concern. [B] ✦ There was a consensus that low MWn polymers (<10 000) cannot be considered to be of low concern. Whilst high MWn po…	One of the following applies (the paragraphs in this cell are treated as one criterion) ✦ the polymer has a number average molecular weight that is greater than or equal to 1,000 g/mol, but less than 10,000 g/mol, and has such other characteristics relating to weight as are set out → The polymer must have (a) less than 10% (by mass) of molecules with a molecular weight that is less than 500 g/mol…	✦ A polymer that has a number average molecular weight greater than 10000 daltons, with less than 2% of its components having molecular weight less than 500 daltons and less than 5% of its components having molecular weight less than 1000 daltons, excluding → a cationic polymer or a polymer that is reasonably expected to become cationic in a natural aquatic environment, except (a) a polymer whose…	✦ Number average molecular weight (Mn) is between 1000–10000 Da, oligomers of less than 500 Da <10%, oligomers of less than 1000 Da <25%, no reactive functional group of high concern [e.g. heavy metals, Cyano (except non-conjugated), acrylates, aziridine, isocyanates (except capped isocyanates), thioisocyanates, vinyl sulfone, alkoxysilanes (alkyl is methyl or ethyl), amines, spiroalkylamines, ha…	✦ polymer with an average molecular weight in a range of 1000 to 10000 Daltons, contains oligomers of molecular weights below 500 Daltons in an amount of less than 10%; oligomers below 1000 Daltons in an amount of less than 25% OR ✦ A polymer with an average molecular weight over 10000 Daltons, contains oligomers of molecular weights below 500 Daltons in an amount of less than 2%; oligomers below…	See below	✦ a polymer whose number average molecular weight is at least 10,000, in which the content of molecules whose weight is less than 1,000 is less than 5 percent and the content of molecules whose weight is less than 500 is less than 2 percent OR ✦ A polymer whose number average molecular weight is at least 1,000 but less than 10,000, in which the content of molecules whose weight is less than 1,000…	✦ polymers that have number average molecular weight (NAMW) equal to or greater than 10,000 Da, less than 5% of oligomers with MW lower than 1000 Da and less than 2% of oligomers with MW lower than 500 Da, and for cationic polymers, the FGEW should be greater than 5,000 Da. OR ✦ NAMW equal to or greater than 1000 Da and less than 10,000 Da, less than 25% of oligomers with MW lower than 1000 Da an…	✦ Polymers with number average MW greater than or equal to 1,000 and less than 10,000 daltons (and oligomer content less than 10 percent below MW 500 and less than 25 percent below MW 1,000). The polymer cannot contain reactive functional groups unless it meets one of the following criteria → (A) The polymer contains only the following reactive functional groups: carboxylic acid groups, aliphatic…
Impurities, including oligomer content	Concerning MW of low MW compounds giving rise to concern: the agreement was MW below 1,000 Concerning percentage of low MW compounds of concern: no agreement	✦ The presence of impurities, which includes unreacted (residual) monomer in the polymer, was also discussed. While important in the hazard or risk assessment of a polymer, it was not considered to be a criterion for determining the data set needed. [B] ✦ Low health concern polymers showed an even distribution of oligomer content values. In contrast, the distribution of potential health concern p…					See below
Presence of chemically or metabolically reactive or toxic groups	only one value, applicable to epoxy and anhydride groups was mentioned (it was 1 reactive group in 20 monomer units); no general conclusion was reached.	✦ This is a qualitative, i.e., not fully quantitative criterion. It is based on the presence of chemically or metabolically reactive or toxic functional groups within the polymer. → For example, epoxides have been quantified with respect to the potency of their human health toxicity. They require a lower equivalent weight criterion for concern (i.e., 1 000 is in use at present) as compared with a…					See below
Metal content	no value agreed		See below	see above	see below		✦ No metal except for sodium, magnesium, potassium or calcium is contained in the chemical structure ✦ An alternative situation see below			see below
Extractivity / solubility in water	10mg/l was seen as acceptable, provided that test conditions were standardized	✦ Knowledge of water solubility including dispersibility for a polymer is critical for accurate environmental assessments and has obvious relevance to some routes of absorption by humans (e.g. inhalation). [B] ✦ Two cut-off values of 1 and 2 mg/L are in use or were proposed by Member countries. However, specific concerns can override such cut-off values, e.g., US experts presented test data which…	See below	see above		✦ Insoluble polymers	✦ Based on solubility test in acid/alkali, there is no change in the DOC exceeding 1 % (or change in the weight of test substances exceeding 2% when the decision based on the change in DOC is not appropriate) before and after the test, or no cationic properties is indicated in the main structure of the test substance. AND ✦ Based on solubility test in water and organic solvents, there is no chang…
Cationic charge density	the 5,000 equivalent weight value was accepted (as defined by EPA: not more than one cationic charge in 5000 monomer units).	✦ This criterion is important for assessing the potential toxicity of polycationic polymers such as polyamines, quaternary ammoniums, phosphoniums and sulfoniums which are self-dispersing or soluble in water. [B] → The molecular configuration is not an important physical/chemical property for the prediction of the aquatic toxicity of polycationics. → Laboratory methods for charge density measurem…	And, the polymer has a low cationic density → it is not cationic or potentially cationic [if the chemical is likely to become cationic in an aquatic environment that has a pH value greater than 4 and less than 9]; or → the chemical contains one or more cationic, or potentially cationic, groups and at least one of the following applies: (i) the total combined functional group equivalent weight of …	see above	see below		See above	See below	see above	see below
Lipophilicity	-	✦ This criterion is used to predict the potential for absorption through biological membranes and bioaccumulation. Many different approaches are being used to gather data related to this criterion. All seem to have certain practical limitations. [B] → Structure Activity Relationships (SARs) are problematic as MWn increases. If MWn is large enough to prevent uptake through biological membranes, th…
Stability / degradability	-	✦ In the environment, this criterion is important for predicting biodegradation in natural surface waters, sediments and sewage treatment processes. For human health, it is important in gastrointestinal breakdown either through acid hydrolysis or digestion (e.g., ester hydrolysis). [B] ✦ In some Member countries, non-stable polymers are not assessed only as a polymer. [B] ✦ Hydrolysis, thermal st…	And, the polymer is stable (within the meaning given by the Guidelines) → the polymer does not substantially degrade, decompose or depolymerise during use; that is, the polymer is not considerably, meaningfully or to a significantly large extent, changed into simpler, smaller molecular weight chemicals as the result of processes including, but not limited to: oxidation, hydrolysis, heat, sunlight…	see above	see below		A polymer that meets the following stability criteria based on the physicochemical stability tests: → There is no change in the dissolved organic carbon (hereafter referred to as “DOC”) concentration exceeding 1 % (or change in the weight of test substances exceeding 2% when the decision based on the change in DOC is not appropriate) under any pH conditions of test solutions before and after the …		✦ Must not be unstable, degradable, decompose, or depolymerize	see below
Particle size / respirability	-	✦ This criterion is important for the assessment of solids and liquid aerosols as it relates to possible lung toxicity in humans. [B] ✦ This concern appears to be most important for MWn > 10 000. [B] → Polymers with MWns > 10 000 are not expected to be absorbed through lung membranes regardless of their physical/chemical properties. → Polymers with MWns > 1 000 and < 10 000 are expected to be poo…
Presence of monomers on existing chemical inventories	-	✦ The criterion is simple, pragmatic and legally based. In some Member countries, all polymers are notifiable in some form (i.e. the type of complexity of the notification depends on other factors such as production volume). [B] ✦ This criterion has little utility in identifying polymers as low concern, with one exception, that polymers containing new monomers not on the inventory cannot be exemp…
Salts of previously notified or existing polymers	-	✦ There are no data to establish that there is low concern for all existing base polymers and their corresponding new salt forms. Therefore, new salt forms of existing polymers cannot be classified as low concern. [B] ✦ Another consideration is based on the variety and potential concerns for the types of cations or anions which might be used. [B] → A review of available data suggests that in cert…
Chemical structure classes of low concern polymers	-	✦ This criterion is seen to have limited applicability although it may have some use in establishing a baseline for concern. In general, more horizontal, case by case, approaches to determine low concern are preferred. [B] → Certain polyesters (derived from a restricted set of monomers) and polyolefins consisting of only CH are classes of relatively low concern with respect to environmental toxic…	See above	✦ A polymer that is a polyester manufactured solely from reactants listed in Schedule 8 of the Regulations (including pre-defined monobasic acids and natural oils, dibasic and tribasic acids and esters, polyols, and modifiers) or an anhydrous form of those reactants, other than the reactants of their anhydrous forms that include both 1-butanol and fumaric or maleic acid. (irrespective of stabilit…	belonging to polyesters	✦ polyester polymers				Polyester polymers (a chemical substance that meets the definition of polymer and whose polymer molecules contain at least two carboxylic acid ester linkages, at least one of which links internal monomer units together) and is manufactured solely from one or more of the reactants in the following: → Benzoic acid; canola oil; coconut oil; corn oil; cottonseed oil; dodecanoic acid; fats and glyceri…
Production volume	-	Production volume is used in all present or proposed systems, but mainly for determining whether notification, or what type of notification is appropriate (e.g. low volume exemptions in many Member countries’ new chemical notification procedures). [B] → Production volume is generally seen as one practical surrogate for exposure. As such it is related to the assessment of risks rather than intrins…
Intended uses	-	While not a criterion for assessing the degree of concern by itself, it is one of the important data elements in the evaluation of the potential risks of polymers. [B] → This information can be useful in determining the media (soil, water, air) of priority interest. → The intended use of the polymer is compared with its chemical structure and physical/chemical properties to identify possible inco…
Others	-	-	✦ And, the polymer does not have any known hazard classification ✦ And, the polymer contains, as an integral part of its composition, at least 2 of the chemical elements set out → carbon; hydrogen; nitrogen; oxygen; silicon; sulfur ✦ And, the polymer does not contain, as an integral part of its composition (other than as an impurity), an element other than a chemical element set out in clause 6 →…		When meeting one of the following conditions, polymers must undergo either regular or simplified registration: → cationic polymers (e.g., containing ions with phosphonium, sulfonium, ammonium ions, etc.) or that are expected to become cationic in a natural aqueous environment (e.g. polymers containing amine groups, isocyanates, etc.) → degradable or unstable polymers, including polymers that are …			Any of the following polymers is NOT included in PLC → A cationic polymer (excluding a polymer that is used only in solid state and not soluble or dissolved in water); → A polymer whose number average molecular weight is less than 10,000, in which an unreacted monomer, which is any of the following chemical substances, constitutes more than 0.1 percent by weight: (1) A hazardous chemical substanc…		Polymers that do not meet PLC criteria → Cationic polymers (a polymer that contains a net positively charged atom(s) or associated groups of atoms covalently linked to its polymer molecule): A polymer cannot be manufactured under this section if the polymer is a cationic polymer … or if the polymer is reasonably anticipated to become a cationic polymer in a natural aquatic environment (e.g., rive…
General considerations
General consideration	-	✦ None of the criteria can be used individually but need to be applied in combination. [Molecular weight, oligomer content and molecular weight distributions, water solubility and lipophilicity] were seen to be basic criteria that may be used for identifying polymers which only need limited data for establishing their potential hazard (e.g. polymers of low concern as identified in the proposal of…
Limited data set for polymers	-	✦ The elements of this data set are generally those which are needed to further evaluate the degree of concern or to determine the need for specific data beyond that contained in the limited data set, including: [B] → Number average molecular weight (MWn); Molecular weight distribution (e.g. percent <500 MW and percent <1000 MW); Impurities; Concentration or upper limit(s) of unreacted monomer(s)…
Data set(s) for other polymers	-	Two basic approaches exist for these substances. [B] → Approach 1: based on the application of the OECD Minimum Pre-marketing Data set (the Base set in the European Communities) with the caveats concerning technical feasibility and/or necessity of providing the information. → Approach 2: a process driven by concerns related to each polymer as determined by evaluations of data from the basic crite…
Parameters for health concern		✦ The working group felt that the following parameters should be considered when making a decision on polymers of concern for health effects. [A] → Number-average MW (Mn); Low MW content; Presence of reactive functional groups; Presence of bioavailable metals, that were part of the polymer structure ✦ The working group felt that solubility in water should not be considered (because some water-ins…
Parameters for environmental concern		✦ The working group felt that the following parameters should be considered when making a decision on polymers of concern for environmental effects [A] → Number-average MW (Mn); Low MW content; Presence of reactive functional groups; Presence of bioavailable metals; Biotic and abiotic stability; Cationic charge density; Water solubility/extractivity
Other lessons learned		✦ A minority of polymers that meet the PLC criteria exhibited some potential of health concern (17 of 139 polymers, or 12.2%), although this may not be a reflection of the hazard of these polymers. No explanation for these effects was apparent from the data available. Some explanation might include: 1. the observed health effects were caused by a mechanism not effectively covered by the data coll…
References
[A]	Third Meeting of OECD Experts on Polymers – Chairman’s report (ENV/MC/CHEM/RD(93)4)
[B]	Second Meeting of the OECD Expert Group on Polymer Definition – Chairman’s report (ENV/MC/CHEM(91)18)
[C]	Data analysis of the identification of correlations between polymer characteristics and potential for health or ecotoxicological concern (ENV/JM/MONO(2009)1
	Notes: Data for 205 polymers were collated from Australia, Canada, Japan, Korea and US. Countries classified the polymers under two categories (PLCs and non-PLCs) using the US EPA criteria. The analysis was aimed at identifying correlations between polymer characteristics and potential for health or ecotoxicological concern.

## Sheet: Table S3. Polymer regulations
	Regulatory approaches to polymer registration	Polymer-related (additional) data and test requirements
Australia	Exempted introductions -- a one-time post-introduction declaration (information on the number of different polymers) is needed, excepted for polymers that are comparable to listed polymers → polymers that are comparable to listed polymers [i.e., the polymer contains each of the reactants that another polymer that is listed on the Inventory (the listed polymer) does; and the polymer contains one o…	Information to demonstrate that the chemical is a high molecular weight polymer, and if you are seeking to demonstrate that the introduction meets the criteria for very low risk – table results from an in vitro study on the polymer or from suitable read across information conducted following an acceptable test guideline for gene mutation, which demonstrates the absence of mutagenic efforts	https://www.legislation.gov.au/Details/F2022C00255
Canada	✦ Reduced regulatory requirement (RRR) polymers -- they are subject to the notification requirements set out in the Regulations; however, they are subject to fewer information requirements in comparison to Non-RRR polymers. The letter "P" after identifier of a substance on the DSL indicates that the substance was assessed and added on the basis that it met the RRR polymer criteria ✦ Polymer on th…	Different information requirements for information respecting biopolymers, respecting reduced regulatory requirement polymers and other polymers and biopolymers (1000 kg), respecting other polymers and biopolymers on the NDSL or all of whose reactants are on the DSL or NDSL (10000 kg), and respecting other polymers and biopolymers NOT on the NDSL (for details, see https://laws-lois.justice.gc.ca/…	New Substances Notification Regulations (Chemicals and Polymers) (SOR/2005-247) (2021): https://laws-lois.justice.gc.ca/eng/regulations/SOR-2005-247/index.html
China	✦ Recordation instead of registration → the new chemical substance is a polymer with the monomer or reactant content of less than 2% [either polymers themselves are not in IECSC, but new chemical substance monomers/reactants are equal to or below 2%; or polymers themselves are not in IECSC, but all monomers/reactants are listed in IECSC] → the new chemical substance is a polymer of low concern ✦ …	✦ Recordation → application form and proofing documents that the chemical substances meet the requirements → the environmental and health hazard characteristics, and environmental risks of the new chemical substances that the applicant has obtained → when applying for recordation of polymers, the applicants shall provide the following information: (1) a list of monomers and reactants, including c…	https://www.mee.gov.cn/xxgk2018/xxgk/xxgk01/202011/t20201119_808843.html
Taiwan, China	✦ Exempted from the regulations → polymers that the 2% Rule [a polymer when its monomers or reactants may not be regarded as part of the polymer when the weight percentage of the monomers or reactants is less than two percent; if the naming of the polymer is a monomer-based representation, it may or may not include monomers and other reactants used at two weight percent or less] is applicable and…	✦ Small quantity registration → basic identification of the substance → information on manufacture, use and exposure of the substance	https://law.moj.gov.tw/ENG/LawClass/LawAll.aspx?pcode=O0060043
Japan	PLC exempted from notification of manufacture/import, but requested to have a confirmation from the authorities that the PLC does not pose a risk of harming human health or damage to the inhabitation and/or growth of flora and fauna in the living environment by causing environmental pollution No need to notify intentional additives and unintentional contaminants if the concentration rate is less …	Standards regarding new chemical substances which are polymers and which do not thought to pose a risk of causing damage to human health or the habitat and/or growth of flora and fauna in the human living environment by causing environmental pollution (September 2021): https://www.nite.go.jp/data/000128218.pdf It details test methods for the physicochemical stability and the solubility with respe…	https://www.japaneselawtranslation.go.jp/en/laws/view/3350	https://www.meti.go.jp/policy/chemical_management/english/cscl/files/laws/laws_notice_polymer.pdf (Evaluation criteria of new chemical substances that are polymers and that do not pose a risk of causing damage to human health or the habitat and/or growth of flora and fauna in the human living environment by causing environmental pollution)
Republic of Korea	PLC exempted from registration, but confirmation of exemption from registration, etc., only once for the first confirmation		https://elaw.klri.re.kr/eng_service/lawView.do?hseq=49167&lang=ENG
Philippines	Criteria for polymer exemption from pre-manufacture registration process -- meeting any of the following criteria, applications for polymer exemption required → All of its monomers must be listed in the PICCS. → Polymers containing monomers and other reactants (including crosslinking, chain transfer agents, and post polymerization reactants) not in the PICCS added at quantities less than 2 percen…	Requirements for application of polymer exemption from PMPIN process [D], including → Duly notarized and accomplished Polymer Exemption Form. → Polymer information like specific chemical name, chemical structure, CAS number (if available), use/s of the polymer. → [SDS] for the polymer alone or the mixture/product where the polymer is part of the ingredients. → 100% composition of the polymer incl…	https://chemical.emb.gov.ph/wp-content/uploads/2019/11/DAO201918Polymer.pdf
Switzerland	Exempted from the notification requirement → polymers as well as substances contained therein (monomers or substances chemically bound to the polymer) below 2% [by weight, monomers must be notified]		https://www.anmeldestelle.admin.ch/chem/en/home/themen/pflicht-hersteller/stoffe/neuer-stoff.html
US	PLC exempted from premanufacture notification	✦ For PLC → a report of manufacture or import must be submitted (postmarked) by January 31 of the year subsequent to initial manufacture, including manufacturer’s name and number of substances manufactured → the manufacturer must to the extent known to or reasonably ascertainable by the manufacturer identify the following and maintain the records: (1) A specific chemical name and CAS Registry Num…	https://www.epa.gov/reviewing-new-chemicals-under-toxic-substances-control-act-tsca/polymer-exemption-new-chemicals https://www.ecfr.gov/current/title-40/chapter-I/subchapter-R/part-723#sp40.34.723.b
		→ A manufacturer …, must retain the records described in this paragraph at the manufacturing site for a period of 5 years from the date of commencement of manufacture or import. (1) Chemical identity information …; (2) Information to demonstrate that the new polymer is not specifically excluded from the exemption; (3) Records of production volume for the first 3 years of manufacture and the date …
		✦ For non-PLC polymers, additional information includes → the specific chemical name and CASRN, if the number is available, of each monomer and other reactant used, at any weight percent, to manufacture the polymer. Tradenames or generic names of chemical reactants or monomers are not acceptable as substitutes from specific chemical names. → the typical percent by weight of each monomer and other…
